# Supplementary material for: Targeted inactivation of Salmonella Agona metabolic genes by group II introns and in vivo assessment of pathogenicity and anti-tumour activity in mouse model
Source: PeerJ. 2019 Jan 16;7:e5989. doi: 10.7717/peerj.5989 (PMC6339473; doi:10.7717/peerj.5989)
Supplement: Data S2 [file peerj-07-5989-s008.xlsx]

## Sheet: Large-Single
PBS	Tumour size cm3				W	Tumour size cm3					BD	Tumour size cm3				LA	Tumour size cm3				BDLA	Tumour size cm3
Day	1	2	3		Day	1	2	3	4		Day	1	2	3		Day	1	2	3		Day	1	2	3
28	16660.5	13177	9565.84		28	6564.38	5138.64	6428.1	4235.69		28	4135.2	4587.3	4186.2		28	6718.4	5360.53	6428.1		28	5655.94	4638.97	5311.5
26	13492.4	12303	8026.2		26	6240	4380.48	5824	4133.9		26	3831.1	4317.6	3772.2		26	5695.04	5274.36	5824		26	5695	4505.28	4576
24	11243.7	11638	6054.2		24	6280.55	5307.52	5636.38	3569.01		24	3189.3	4123.6	3447		24	5180.56	4977.27	4866.63		24	5018.75	4374.17	4212
22	11454.5	11676	5674.11		22	5536.44	3757	4093.31	2810.93		22	2855.3	3837.9	3125.8		22	3993.6	4410.9	4373.88		22	3915.62	3606.72	3625.57
20	8892	10546	5161.13		20	4158.48	3682.58	3258.18	2648.52		20	2675	3459.9	2769.21		20	3727.36	4317.56	4549		20	3907.28	3306.16	4035.98
18	8626.18	9882.8	4716.2		18	4059.1	2593.73	3565.52	2842.9		18	2377.6	3080.7	2312.19		18	4034.75	3122.89	4156.29		18	3286.69	2872.62	3117.99
16	7634.75	9162.18	3536.87		16	3959.28	3496.48	2873.39	2141.8		16	2048.85	2990.57	2303.5		16	2700.88	3408.31	2996.75		16	2492.1	1848.02	1827.9
14	5624.32	7733.44	2344.16		14	1535.04	1625.78	2928.64	1347.84		14	1259.38	1967.94	1235.52		14	1478.62	2129.92	2457		14	2186.6	1725.2	2340
12	4792.32	4815.72	2077.27		12	968.05	2398.5	2685.99	1195.48		12	1160.64	1834.56	1406.08		12	1684.8	2404.48	1845.48		12	1800.63	1630.72	1845.48
10	5391.36	6051.76	2019.76		10	947.986	1226.86	1724.81	1148.03		10	1340.62	1273	1259.48		10	1434.41	1532.3	1302.44		10	1145.1	831.285	1497.6
8	4343.62	4540.54	1757.6		8	1044.15	1258.92	1431.84	884		8	728	1138.92	884		8	1032.46	1421.55	1117.93		8	962	610.74	1581.84
6	2912	3116.88	975.26		6	582.335	832	863.46	409.5		6	351	716.625	526.5		6	619.905	898.56	884		6	589.68	630.63	780
4	1783.8	1638	589.68		4	532.48	515.84	438.75	318.5		4	307.125	630.63	382.72		4	565.76	755.04	694.98		4	449.28	463.32	975.26
2	1480.7	1048.32	518.47		2	468	438.75	438.75	293.02		2	307.125	605.929	292.5		2	499.2	804.609	832		2	416	400.14	676
0	767.62	617.76	508.7		0	429.69	369.46	461.87	284.1		0	293.73	354.65	303.7		0	492.54	488.54	539.05		0	419.3	387.504	444.5

## Sheet: Large-Multiple
W	Tumour size cm3					BD	Tumour size cm3					LA	Tumour size cm3						BDLA	Tumour size cm3
Day	1	2	3	4		Day	1	2	3	4		Day	1	2	3	4	5		Day	1	2	3	4
28	7268.52	5256.58	5017.46	5558.89		28	4405.81	4432.3	5374.69	5037.93		28	5962.32	3493	6489.6	5503.68	4586.4		28	5033.6	2964.65	5287.92	2369.25
26	7108.9	5255.25	4299.75	5517.07		26	4538.24	4247.1	5054.4	4959.2		26	5733	3061.76	6129.63	5457.82	4207.84		26	4446.85	2900.46	5428.09	2274.48
24	7114.95	4461.27	4551.45	4098.13		24	3845.92	3916.65	4584.34	3745.8		24	4736.28	2423.64	5800.55	5389.02	3499.17		24	4122.07	2435.68	5145.1	2203.56
22	5256.16	3724.36	4388.4	4176.66		22	3509.6	3393	3999.8	3717.1		22	4641.56	2359.7	5303.51	4364.13	3112.2		22	3660.8	2348.2	4613.2	2198.7
20	4962.3	2662.4	4784	3793.92		20	3306.16	3334.5	3982.42	3369.6		20	4576	2038.4	4894.18	3875.04	3039.56		20	3097.38	2554.76	3539.25	2277.66
18	3875.04	3510	3692.08	4227.08		18	3021.82	3311.1	3261.44	2460.64		18	4698.4	2049.9	4380.48	3665.49	2960.1		18	2960.43	2166.02	3193.37	2132.33
16	3369.37	2983.5	3588.62	2652.78		16	2970.41	2732.77	2293.2	2146.44		16	4523.14	2164.73	4178.3	3535.16	1871.84		16	2695.68	2209.8	3468.47	1757.6
14	1845.48	1684.8	2047.5	1444.17		14	1705.86	1933.36	1543.75	1384.24		14	1493.96	917.28	2140.32	1783.6	1003.28		14	1911.2	1638	1497.6	1503.12
12	1581.84	1478.62	2329.6	1065.93		12	1406.08	2662.4	1422.72	1232.6		12	1203.48	589.68	1757.6	1218.75	945.945		12	1019.2	1499.16	1998.88	1003.28
10	1854.38	1092	2780.18	1706.25		10	1053.77	1402.42	1385.28	1232.37		10	1485.99	633.555	1705.86	1540.28	881.843		10	922.74	921.024	832	800.317
8	1203.48	1082.02	1589.95	1272.25		8	806	1048.76	1103.88	788.97		8	1160.64	469.625	1031.55	764.96	760.266		8	601.965	936	1169.09	676.26
6	780	758.16	1232.01	638.69		6	488.41	758.16	532.48	582.4		6	505.44	336.375	702	676	589.68		6	503.36	659.3	525.98	488.41
4	563.16	632.32	507.195	532.48		4	399.36	549.12	424.13	482.625		4	505.44	293.02	728	503.36	465.92		4	424.24	442.26	469.63	416
2	547.56	496.86	525.98	532.48		2	399.36	465.55	384.42	420.42		2	484.38	382.72	728	450.84	449.28		2	364	332.8	450.84	366.08
0	507.66	374.4	361.22	393.2		0	351	356.72	379.64	360.672		0	453.08	280.28	520.6	424.15	432.64		0	359.12	263.25	443.33	203.88

## Sheet: Small-Single
PBS	Tumour size cm3					W	Tumour size cm3				BD	Tumour size cm3						LA	Tumour size cm3				BDLA	Tumour size cm3
Day	1	2	3	4		Day	1	2	3		Day	1	2	3	4	5		Day	1	2	3		Day	1	2	3
22	3268.2	5892.4	3942.12	3875.51		22	4285.74	3100.5	3497.22		22	3904.74	5734.68	2929.46	3548.38	2702.7		22	3591.69	2358.81	4842.37		22	3698.08	4146.7	3045.48
20	2925.79	5087.2	3306.14	3456.4		20	3522.73	2700.9	3053.3		20	3882.1	5036.1	2248.7	3277.52	2329.07		20	3369.37	1973.24	4049.18		20	3535.16	3445.94	2473.61
18	2424.87	4597.43	2597.35	2503.97		18	2937.48	2380.86	2261.93		18	3585.18	3979.14	1615.8	2450.65	1940.92		18	2340.23	1961.68	2847.76		18	2607.94	2752.21	1992.21
16	1336.6	2725.53	2136.88	1741.17		16	2620.63	1652.4	1537.44		16	2368.33	2981.67	1400.11	2031.34	1649.12		16	1573.52	1606.43	2182.16		16	2048.9	2108.88	1610.89
14	858.098	2038.53	1524.44	1416.89		14	2324.62	1447.74	1391.42		14	2329.24	2476.09	1019.3	1443.26	1278.05		14	1400.51	1307.2	1761.71		14	1823.18	1986.85	1249.42
12	1064.96	1686.29	1154.15	996.559		12	1948.91	1029.25	1178.12		12	1713.2	1834.92	703.95	1119.98	916.764		12	1303.38	1187.93	1680.68		12	1188.79	1936.48	1169.09
10	661.713	1162.7	916.363	753.659		10	1195.78	1143.07	835.509		10	1395.18	1057.11	593.667	698.397	784.071		10	894.348	877.293	1362.18		10	878.53	1140.27	1104.27
8	501.228	910.541	901.875	788.767		8	939.353	937.836	788.885		8	1160.95	1008.83	480.168	526.891	578.574		8	642.587	799.084	1453.76		8	607.377	1170.6	993.262
6	452.626	617.933	584.27	377.919		6	640.692	368.816	560.556		6	817.96	821.69	486.033	616.478	513.677		6	487.252	401.46	703.32		6	552.873	863.2	438.118
4	307.13	608.388	337.56	347.48		4	528.528	283.833	318.825		4	511.537	575.08	319.488	486.592	310.459		4	446.984	397.524	555.984		4	366.912	631.8	376.478
2	254.8	562.934	263.25	292.08		2	416	251.68	283.046		2	340.252	505.42	292.893	363.75	238.766		2	349.44	229.652	405.291		2	316.16	449.28	335.479
0	230.24	447.06	286.21	250.58		0	371.84	239.5	272.62		0	346.13	440.13	233.3	292.5	200.304		0	316.37	203.84	402.94		0	309.5	338.88	272.64

## Sheet: Small-Multiple
W	Tumour size cm3				BD	Tumour size cm3				LA	Tumour size cm3					BDLA	Tumour size cm3
Day	1	2	3		Day	1	2	3		Day	1	2	3	4		Day	1	2	3
22	3414.43	3810.61	3011.22		22	1972.96	4413.7	2478		22	2447.47	2429.8	3512.4	2244.3		22	1872	2301.59	3889.3
20	2721.65	3133	2786.53		20	1740.4	3847.2	2305.6		20	2112.17	2044.79	2999.25	1898.2		20	1736.49	2292	2978.8
18	2377.6	2693.4	2505.6		18	1280.47	2663.1	2150.3		18	1814.18	1098.43	2419.12	1354.77		18	1550.7	2269.8	2388.2
16	2153.06	2731.1	2458.88		16	1022.48	2485.01	2357.75		16	2096.49	938.887	2180.18	1220.65		16	1071.4	2164.5	1956.56
14	1873.47	2242.42	1446.25		14	746.187	1663.07	1686.58		14	1485.17	833.864	1294.78	692.49		14	825.24	1807.69	1921
12	1486.49	1861.75	911.464		12	607.655	1427.41	1007.03		12	1088.75	634.933	1024.4	692.623		12	624.897	976.534	1660.64
10	1253.79	1252.91	561.504		10	642.552	1051.69	832		10	999.186	425.465	656.381	520.976		10	561.6	699.653	716.04
8	690.947	896.988	629.477		8	353.134	1155.31	680.509		8	547.56	233.428	673.92	472.576		8	534.367	554.959	612.391
6	382.113	778.799	509.184		6	321.048	659.027	931.216		6	510.548	299.277	390.874	317.391		6	322.816	252.655	582.4
4	345.974	635.675	397.717		4	220.896	665.496	531.341		4	416.988	265.019	389.133	343.98		4	277.732	241.67	696.65
2	286.65	385.112	315.952		2	215.28	356.72	386.048		2	276.224	246.898	326.806	224.64		2	202.176	228.488	397.488
0	276.8	341.1	271.5		0	173.03	352.3	223.6		0	253.094	230.685	329.89	220.896		0	171.457	217.252	369.46
