# Supplementary material for: Targeted inactivation of Salmonella Agona metabolic genes by group II introns and in vivo assessment of pathogenicity and anti-tumour activity in mouse model
Source: PeerJ. 2019 Jan 16;7:e5989. doi: 10.7717/peerj.5989 (PMC6339473; doi:10.7717/peerj.5989)
Supplement: Data S3 [file peerj-07-5989-s009.xlsx]

## Sheet: cfu
Spleen	cfu/g		LOG value		Average			Liver	cfu/g		LOG value		Average			Lung	cfu/g		LOG value		Average
	Day 3	Day 10	Day 3	Day 10	Day 3	Day 10			Day 3	Day 10	Day 3	Day 10	Day 3	Day 10			Day 3	Day 10	Day 3	Day 10	Day 3	Day 10
W	875000	752475	5.94201	5.87649	6.27427	5.72447		W	27118.6	190896	4.43327	5.2808	4.88065	5.11183		W	683127	1.03704e+07	5.8345	7.01579	5.8345	7.04012
	2.23529e+06	750000	6.34933	5.87506					134737	119533	5.12949	5.07749					666667	1.15996e+07	5.82391	7.06444
	3400000	264151	6.53148	5.42185					120000	94888	5.07918	4.97721					700000	10967786	5.8451	7.04012
BD	1400000	550000	6.14613	5.74036	6.34205	5.69412		BD	59821.7	149253	4.77686	5.17392	4.91533	5.10811		BD	905660	2.76786e+06	5.95697	6.44214	5.72312	6.0551
	2500000	351648	6.39794	5.54611					116227	109344	5.06531	5.03879					527086	576923	5.72188	5.76112
	3.03448e+06	625000	6.48208	5.79588					80134	129300	4.90382	5.1116					309392	916300	5.49051	5.96204
LA	274418	933962	5.43841	5.97033	5.55283	5.90387		LA	68700	148301	4.83696	5.17114	4.68533	5.26754		LA	283827	2.07073e+06	5.45305	6.31612	5.45305	6.25753
	580952	597087	5.76414	5.77604					20863	227683	4.31938	5.35733					527183	1202020	5.72196	6.07991
	285714	923077	5.45593	5.96524					79372	187992	4.89967	5.27414					152809	2379923	5.18415	6.37656
BDLA	376471	732456	5.57573	5.86478	5.64525	5.85046		BDLA	42328	122091	4.62663	5.08668	4.39117	5.03229		BDLA	141884	1879699	5.15193	6.27409	5.28099	6.13704
	518519	685714	5.71476	5.83614					19167	94523.2	4.28255	4.97554					190982	1000000	5.28099	6
	441823	708697	5.64525	5.85046					18378.7	108307	4.26432	5.03466					257069	1371020	5.41005	6.13704
Kidney	cfu/g		LOG value		Average			Intestine	cfu/g		LOG value		Average			Tumour	cfu/g		LOG value		Average
	Day 3	Day 10	Day 3	Day 10	Day 3	Day 10			Day 3	Day 10	Day 3	Day 10	Day 3	Day 10			Day 3	Day 10	Day 3	Day 10	Day 3	Day 10
W	375000	1.94175e+06	5.57403	6.28819	5.70214	6.31865		W	747058	729040	5.87335	5.86275	5.7201	5.83716		W	1.00909e+09	1.1675e+11	9.00393	11.0673	9.14776	11.1852
	676471	3.19287e+06	5.83025	6.50418					364000	589023	5.5611	5.77013					1.34667e+09	1.97312e+11	9.12926	11.2952
	503662	1.45734e+06	5.70214	6.16356					531915	756144	5.72584	5.8786					2.04219e+09	1.55996e+11	9.3101	11.1931
BD	107841	486491	5.03278	5.68707	5.12532	5.36398		BD	187096	812891	5.27206	5.91003	5.35324	5.52337		BD	9.49222e+08	233879352623	8.97737	11.369	8.9063	11.421
	90140.8	243056	4.95492	5.38571					227998	239704	5.35793	5.37968					6.66667e+08	3.39235e+11	8.82391	11.5305
	244494	104507	5.38827	5.01914					268980	190722	5.42972	5.2804					8.27199e+08	230933147278	8.91761	11.3635
LA	13755.7	457142	4.13848	5.66005	4.61297	5.53439		LA	127410	115963	5.1052	5.06432	5.22751	5.34942		LA	1.6269e+09	3.53436e+11	9.21136	11.5483	9.03876	11.5575
	55741.4	348888	4.74618	5.54269					169005	223573	5.2279	5.34942					6.92679e+08	3.68722e+11	8.84053	11.5667
	90000	251446	4.95424	5.40044					223571	431034	5.34942	5.63451					1.15979e+09	3.61079e+11	9.06438	11.5576
BDLA	59440	81162.1	4.77408	4.90935	4.65675	5.0519		BDLA	85867.6	125440	4.93383	5.09844	5.0647	5.06411		BDLA	1.27142e+09	4.59861e+11	9.10429	11.6626	9.10429	11.3858
	76923	151551	4.88606	5.18056					157261	106869	5.19662	5.02885					1.27701e+09	109696376101	9.1062	11.0402
	20423	116357	4.31012	5.06579					115782	116156	5.06364	5.06504					1.26582e+09	2.84779e+11	9.10237	11.4545
