# Supplementary material for: Targeted inactivation of Salmonella Agona metabolic genes by group II introns and in vivo assessment of pathogenicity and anti-tumour activity in mouse model
Source: PeerJ. 2019 Jan 16;7:e5989. doi: 10.7717/peerj.5989 (PMC6339473; doi:10.7717/peerj.5989)
Supplement: Data S4 [file peerj-07-5989-s010.xlsx]

## Sheet: SPLEEN
cfu/g (average)	DAY 1	DAY 3	DAY 10	DAY 21	DAY 36
W	1797802	1.51283e+07	3.3026e+06	175010	22673.5
BD	2.13602e+06	2.38376e+07	1.35384e+06	85362	16730
LA	1.22858e+06	7.86697e+06	1346415	63108	11587
BDLA	1790000	3.71172e+06	622088	34877	15504
LOG value	DAY 1	DAY 3	DAY 10	DAY 21	DAY 36
W	6.25474	7.17979	6.51886	5.24306	4.35552
BD	6.32961	7.37726	6.13157	4.93126	4.2235
LA	6.0894	6.89581	6.12918	4.80008	4.06397
BDLA	6.25285	6.56957	5.79385	4.50939	4.19044
Column1	DAY 1	DAY 3	DAY10	DAY 21	DAY 36
W1	1538461	5875000	3692307	146154	11304
2	2057143	15238095	3500000	250877	34043
3		14400000	3076923	128000
4		25000000	2941176
LOG10	DAY 1	DAY 3	DAY10	DAY 21	DAY 36
	6.18709	6.76901	6.5673	5.16481	4.05323
	6.31326	7.18293	6.54407	5.39946	4.53203
		7.15836	6.48812	5.10721
		7.39794	6.46852
SD	0.0892213	0.261839	0.0463573	0.154806	0.33856
Column1	DAY 1	DAY 3	DAY 10	DAY 21	DAY 36
BD	3043478	12413793	1384905	77777	14889
	1228571	35000000	1023255	92947	18571
		24098865	1653355
	DAY 1	DAY 3	DAY10	DAY 21	DAY 36
LOG10	6.48337	7.0939	6.14142	4.89085	4.17287
	6.0894	7.54407	6.00998	4.96824	4.26884
		7.382	6.21837
SD	0.278579	0.228003	0.105372	0.0547189	0.0678609
Column1	DAY 1	DAY 3	DAY 10	DAY 21	DAY 36
LA	1065853	6800000	2000000	66216	12174
	1391304	9000000	1346938	60000	11000
		7800900	692307
LOG10	6.0277	6.83251	6.30103	4.82096	4.08543
	6.14342	6.95424	6.12935	4.77815
		6.89214	5.8403
SD	0.0818297	0.0608709	0.232844	0.0302724	#DIV/0!
Column1	DAY1	DAY3	DAY 10	DAY 21	DAY 36
BDLA	1880000	3636364	344186	21754	16667
	1700000	4173913	885714	48000	14341
		2536585	636363
		4500000
	6.27416	6.56067	5.53679	4.33754	4.22186
	6.23045	6.62054	5.94729	4.68124	4.15658
		6.40425	5.8037
		6.65321
SD	0.0309069	0.110472	0.208315	0.243034	0.0461585

## Sheet: LIVER
cfu/g( average)	DAY 1	DAY 3	DAY 10	DAY 21	DAY 36
W	228256	394730	98324.8	577.667	387.5
BD	292797	125748	57604.7	520.5	425
LA	232094	114524	56889.3	384	505
BDLA	104929	52828	39040.3	331	327.5
LOG value	DAY 1	DAY 3	DAY 10	DAY 21	DAY 36
W	5.35842	5.5963	4.99266	2.76168	2.58827
BD	5.46657	5.0995	4.76046	2.71642	2.62839
LA	5.36566	5.0589	4.75503	2.58433	2.70329
BDLA	5.0209	4.72286	4.59151	2.51983	2.51521
Column1	DAY 1	DAY 3	DAY 10	DAY 21	DAY 36
W	201966	521901	93023	240	392
	254545	264635	139982	618	383
		385788	61232	875
		406596	99062
LOG10	5.30528	5.71759	4.96859	2.38021	2.59329
	5.40576	5.42265	5.14607	2.79099	2.5832
		5.58635	4.78698	2.94201
		5.60916	4.99591
SD	0.0710545	0.121818	0.147303	0.290735	0.00713279
Column1	DAY 1	DAY 3	DAY 10	DAY 21	DAY 36
BD	229230	50104	48239	541	543
	356364	141161	55020	500	307
		185980	69555
LOG10	5.36027	4.69987	4.6834	2.7332	2.7348
	5.55189	5.14971	4.74052	2.69897	2.48714
		5.26947	4.84233
SD	0.135497	0.300315	0.0805052	0.0242023	0.175123
Column1	DAY 1	DAY 3	DAY 10	DAY 21	DAY 36
LA	235616	140704	70588	588	432
	228571	98327	40000	180	578
		104540	60080
LOG10	5.3722	5.14831	4.84873	2.76938	2.63548
	5.35902	4.99267	4.60206	2.25527	2.76193
		5.01928	4.77873
SD	0.00932225	0.0832437	0.127121	0.363527	0.0894095
Column1	DAY 1	DAY 3	DAY 10	DAY 21	DAY 36
BDLA	106329	39002	25874	455	431
	103529	18519	48669	207	224
		132333	42578
		21458
LOG10	5.02665	4.59109	4.41286	2.65801	2.63448
	5.01506	4.26762	4.68725	2.31597	2.35025
		5.12167	4.62919
		4.33159
SD	0.00819516	0.388502	0.144601	0.24186	0.20098

## Sheet: LUNG 
cfu/g (average)	DAY 1	DAY 3	DAY 10	DAY 21	DAY 36
W	1.31429e+06	20060418	1.60744e+08	31722.5	41000
BD	1.65731e+06	17170266	7.60245e+07	19475	20886
LA	1209859	12147510	4.33343e+07	30116	32984.5
BDLA	1.71847e+06	6.13024e+06	35704677	11502	31806.5
LOG value	DAY 1	DAY 3	DAY 10	DAY 21	DAY 36
W	6.11869	7.30234	8.20614	4.50137	4.61278
BD	6.2194	7.23478	7.88095	4.28948	4.31986
LA	6.08273	7.08449	7.63683	4.4788	4.51831
BDLA	6.23514	6.78748	7.55273	4.06077	4.50252
Column1	DAY 1	DAY 3	DAY 10	DAY 21	DAY 36
W	1200000	12698412	96551724	14599	42500
	1428571	24000000	26923076	15625	39500
		24242424	220994475	30000
		19300836	298507462	66666
LOG 10	6.07918	7.10375	7.98476	4.16432	4.62839
	6.1549	7.38021	7.43012	4.19382	4.5966
		7.38458	8.34438	4.47712
		7.28558	8.47496	4.8239
SD	0.0535425	0.131381	0.467424	0.30704	0.0224802
Column1	DAY 1	DAY 3	DAY 10	DAY 21	DAY 36
BD	1736842	17000000	35328753	18180	28571
	1577777	17902098	58666666	20770	13201
		16608700	134078212
LOG 10	6.23976	7.23045	7.54813	4.25959	4.45593
	6.19805	7.2529	7.76839	4.31744	4.12061
		7.22034	8.12736
SD	0.0294967	0.0166693	0.29237	0.0409009	0.237106
Column1	DAY 1	DAY 3	DAY 10	DAY 21	DAY 36
LA	1300000	8695652	42203985	12232	33969
	1119718	15714286	71910112	48000	32000
		12032592	15888778
LOG 10	6.11394	6.9393	7.62535	4.0875	4.53108
	6.04911	7.19629	7.85679	4.68124	4.50515
		7.08036	7.20109
SD	0.0458451	0.128701	0.332542	0.41984	0.0183372
Column1	DAY 1	DAY 3	DAY 10	DAY 21	DAY 36
BDLA	1727272	8216216	37390300	7520	33613
	1709677	1600000	44002801	15484	30000
		8574491	25720930
LOG 10	6.23736	6.91467	7.57276	3.87622	4.52651
	6.23291	6.20412	7.64348	4.18988	4.47712
		6.93321	7.41029
SD	0.00314427	0.415692	0.119567	0.221795	0.0349212

## Sheet: KIDNEY
cfu/g (average)	DAY 1	DAY 3	DAY 10	DAY 21	DAY 36
W	692857	5.01395e+06	50288.7	0	0
BD	535714	2.37238e+06	42985.5	0	0
LA	385088	274074	43312.5	0	0
BDLA	253629	300426	29287.5	0	0
LOG value	DAY 1	DAY 3	DAY 10	DAY 21	DAY 36
W	5.84064	6.70018	4.70147	#NUM!	#NUM!
BD	5.72893	6.37518	4.63332	#NUM!	#NUM!
LA	5.58556	5.43787	4.63661	#NUM!	#NUM!
BDLA	5.4042	5.47774	4.46668	#NUM!	#NUM!
Column1	DAY 1	DAY 3	DAY 10	DAY 21	DAY 36
W	700000	7741935	24435
	685714	1408450	49261
		5891473	77170
LOG 10	5.8451	6.88885	4.38801
	5.83614	6.14874	4.6925
		6.77022	4.88745
SD	0.00633216	0.397507	0.251712
Column1	DAY 1	DAY 3	DAY 10	DAY 21	DAY 36
BD	500000	1445783	38000
	571428	3298970	47971
LOG10	5.69897	6.1601	4.57978
	5.75696	6.51838	4.68098
SD	0.0410062	0.253339	0.0715558
Column1	DAY 1	DAY 3	DAY 10	DAY 21	DAY 36
LA	336842	282136	46625
	433333	227548	40000
		312537
LOG 10	5.52743	5.45046	4.66862
	5.63682	5.35707	4.60206
		5.4949
SD	0.0773543	0.0703476	0.0470642
Column1	DAY 1	DAY 3	DAY 10	DAY 21	DAY 36
BDLA	275000	400000	25042
	232258	220183	33533
		281096
LOG 10	5.43933	5.60206	4.39867
	5.36597	5.34278	4.52547
		5.44885
SD	0.0518748	0.13035	0.0896635

## Sheet: INTESTINE
cfu/g (average)	DAY 1	DAY 3	DAY 10	DAY 21	DAY 36
W	699440	935218	316226	2616.67	680.333
BD	633333	643396	194366	1728.5	910.667
LA	414615	538343	366007	1391	565
BDLA	494915	176964	337622	994	1188.5
LOG value	DAY 1	DAY 3	DAY 10	DAY 21	DAY 36
W	5.84475	5.97091	5.5	3.41775	2.83272
BD	5.80163	5.80848	5.28862	3.23767	2.95936
LA	5.61765	5.73106	5.56349	3.14333	2.75205
BDLA	5.69453	5.24788	5.52843	2.99739	3.075
Column1	DAY 1	DAY 3	DAY 10	DAY 21	DAY 36
W	771428	685714	242424	1358	907
	627451	385250	176470	2442	661
		1761006	153098	4050	473
		908900	692913
LOG10	5.8873	5.83614	5.38458	3.1329	2.95761
	5.79758	5.58574	5.24667	3.38775	2.8202
		6.24576	5.18497	3.60746	2.67486
		5.95852	5.84068
SD	0.0634385	0.27425	0.296296	0.237494	0.0971606
Column1	DAY 1	DAY 3	DAY 10	DAY 21	DAY 36
BD	600000	837286	146566	1769	1633
	666666	453001	167391	1688	339
		639902	269142		760
LOG 10	5.77815	5.92287	5.16603	3.24773	3.21299
	5.82391	5.6561	5.22373	3.22737	2.5302
		5.80611	5.42998		2.88081
SD	0.0323551	0.133732	0.138766	0.0143934	0.341435
Column1	DAY 1	DAY 3	DAY 10	DAY 21	DAY 36
LA	600000	457272	427096	1127	530
	229230	650370	386153	2132	600
		507387	284772	914
LOG10	5.77815	5.66017	5.63053	3.05192	2.72428
	5.36027	5.70534	5.58676	3.32879	2.77815
			5.4545	2.96095
SD	0.295486	0.0319363	0.0916467	0.191589	0.0380956
Column1	DAY 1	DAY 3	DAY 10	DAY 21	DAY 36
BDLA	289830	180821	200313	1105	1567
	700000	149509	233333	883	810
		200562	579220
LOG 10	5.46214	5.25725	5.30171	3.04336	3.19507
	5.8451	5.17467	5.36798	2.94596	2.90849
		5.30225	5.76284
SD	0.27079	0.0647066	0.249318	0.0688733	0.202645
