# Supplementary material for: Targeted inactivation of Salmonella Agona metabolic genes by group II introns and in vivo assessment of pathogenicity and anti-tumour activity in mouse model
Source: PeerJ. 2019 Jan 16;7:e5989. doi: 10.7717/peerj.5989 (PMC6339473; doi:10.7717/peerj.5989)
Supplement: Figure S5 [file peerj-07-5989-s005.xlsx]

## Sheet: Sheet1
	0	1	2	3	4	5	6	7	8	9	10	11	12
W	0.025	0.029	0.032	0.056	0.047	0.067	0.123	0.203	0.367	0.689	1.236	1.678	2.029
BD	0.014	0.027	0.045	0.073	0.138	0.271	0.508	0.892	1.465	1.83	1.929	1.932	1.934
LA	0.016	0.021	0.024	0.027	0.027	0.03	0.031	0.032	0.034	0.033	0.033	0.033	0.035
LA+Leu	0.017	0.029	0.046	0.057	0.057	0.102	0.13	0.161	0.198	0.236	0.277	0.334	0.383
LA+Arg	0.019	0.025	0.085	0.033	0.033	0.031	0.036	0.049	0.055	0.057	0.056	0.058	0.056
LA+Leu, Arg	0.035	0.053	0.04	0.195	0.195	0.902	1.676	1.753	1.824	1.81	1.758	1.76	1.749
BDLA	0.016	0.018	0.02	0.024	0.024	0.028	0.029	0.03	0.031	0.031	0.032	0.031	0.033
BDLA+Leu	0.011	0.019	0.082	0.097	0.097	0.146	0.179	0.206	0.243	0.292	0.336	0.44	0.449
BDLA+ Arg	0.057	0.067	0.018	0.019	0.019	0.029	0.027	0.031	0.04	0.042	0.041	0.041	0.042
BDLA + Leu, Arg	0.007	0.016	0.041	0.096	0.096	0.454	0.933	1.451	1.884	1.879	1.859	1.846	1.839
